# Supplementary material
Source: PubMed Central journal article supplement (PMC3291084)

**Web Figure 1. Alternative results with reference constraints of 1988 and 1993 for period effect. Parameter estimates and 95% confidence intervals of age (circles in left-hand panels), period (squares) and cohort (circles) effects (right-hand panels) for all-cause, ischemic heart disease (IHD), other cardiovascular diseases (CVD) excluding IHD, lung cancer, other cancers excluding lung cancer, respiratory disease, all other medical causes and external causes in Hong Kong, 1976–2005**

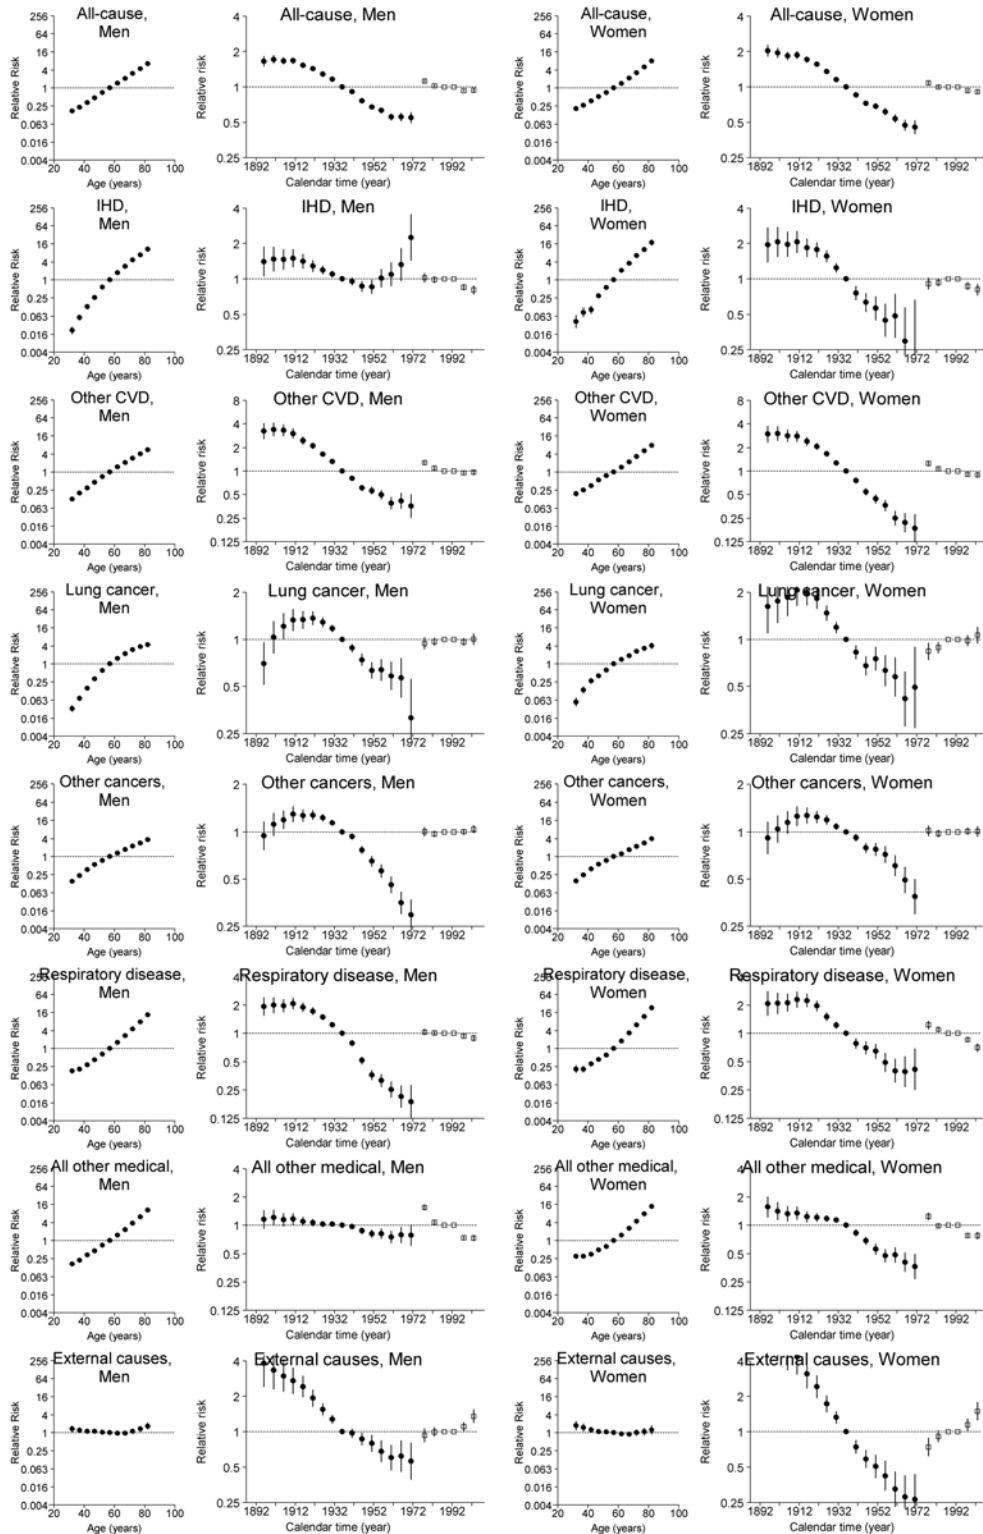

**Web Figure 2.** Parameter estimates and 95% confidence intervals of age effect among men (left-hand panels) and women (right-hand panels) for A) all-cause, B) ischemic heart disease (IHD), C) other cardiovascular diseases (CVD) excluding IHD, D) lung cancer, E) other cancers excluding lung cancer, F) respiratory disease, G) all other medical causes and H) external causes in Hong Kong, 1976–2005

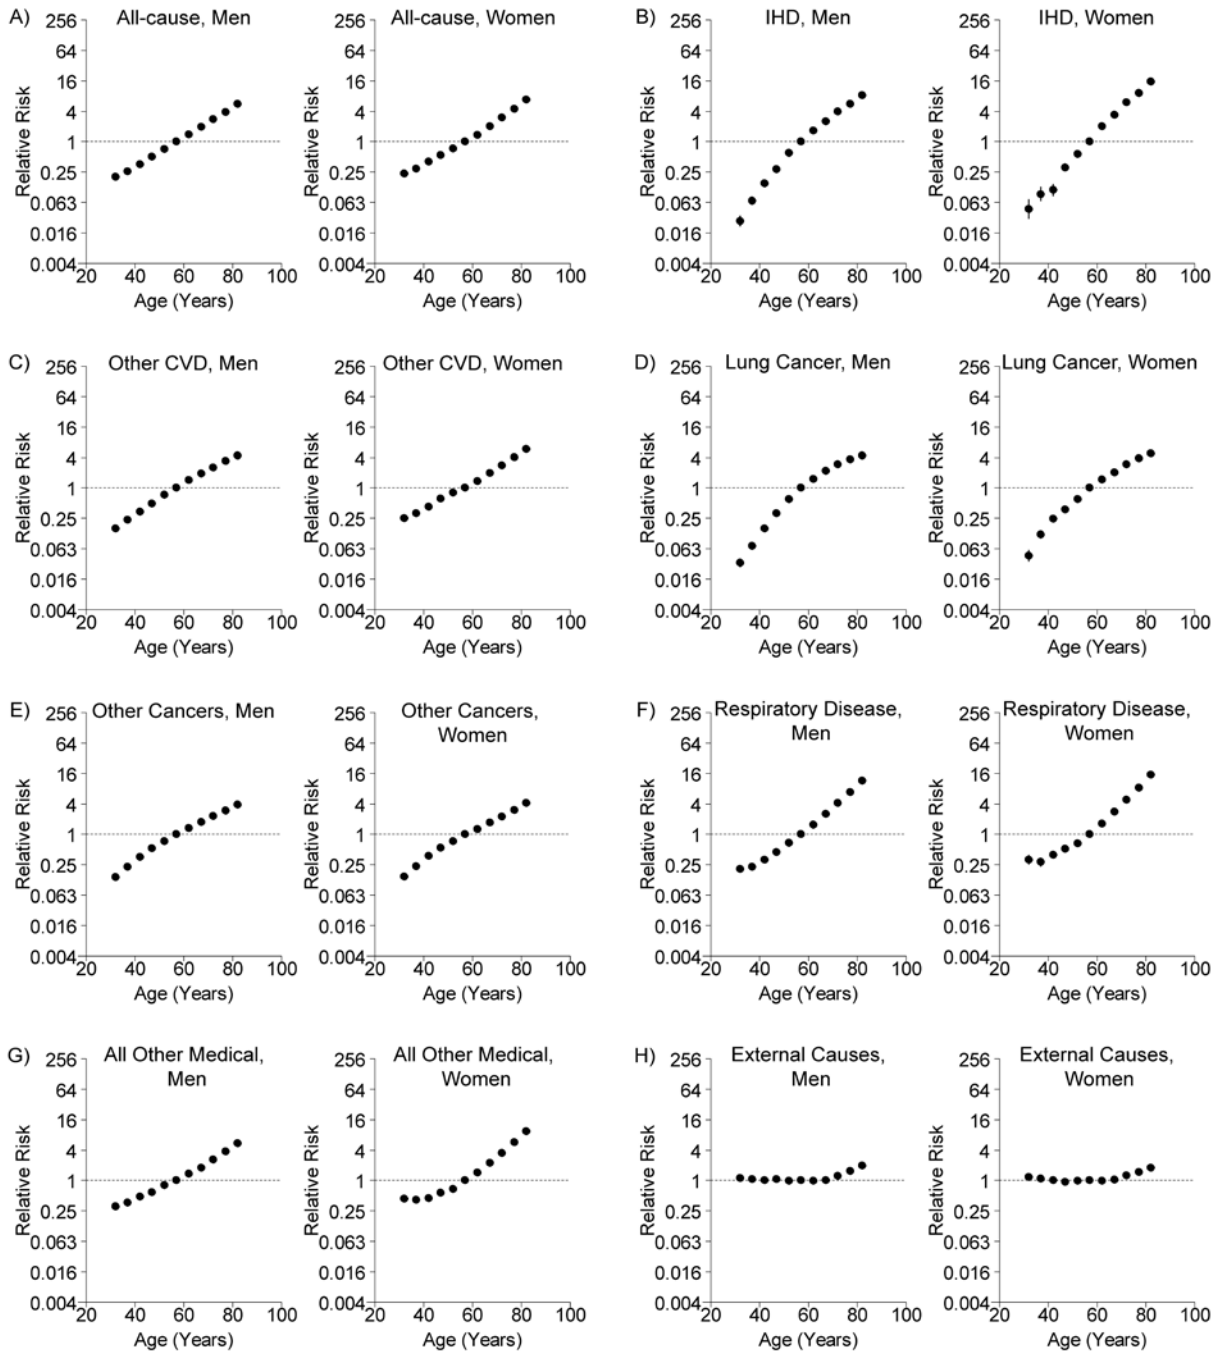

Supplement: supp_kwp378_kwp378_Web_Figures.pdf [file supp_kwp378_kwp378_Web_Figures.pdf]
